# Supplementary material for: Photoreactive salt cocrystal: N+–H⋯N hydrogen bond and cation–π interactions support a cascade-like photodimerization of a 4-stilbazole
Source: Royal Society of Chemistry journal article supplement (doi:10.1039/d0ce01885f), 2021-01-01
Supplement: d0ce01885f1.pdf [file d0ce01885f1.pdf]

## Supplementary Materials

### **Photoreactive salt cocrystal: N<sup>+</sup>-H···N hydrogen bond and cation- $\pi$ interactions support a cascade-like photodimerization of a 4-stilbazole**

Changan Li,<sup>a</sup> Gonzalo Campillo-Alvarado,<sup>a</sup> Dale C. Swenson<sup>a</sup> and Leonard R. MacGillivray<sup>\*a</sup>

<sup>a</sup>*Department of Chemistry, University of Iowa, Iowa City, IA 52242, USA*

*e-mail: len-macgillivray@uiowa.edu*

#### **Supplementary Information:**

- S1) Experimental section
- S2) Single crystal X-ray diffraction data
- S3) Hydrogen bond table
- S4) <sup>1</sup>H NMR spectroscopy data
- S5) Powder X-ray diffraction data

## S1. Experimental section

### Materials:

*Trans*-1-(4-pyridyl)-2-(phenyl)ethylene or 4-stilbazole (**4-stilbz**) was prepared according to a published procedure.<sup>1</sup> Ammonium hexafluorophosphate (**NH<sub>4</sub>PF<sub>6</sub>**) was purchased from Sigma-Aldrich. Solvents were purchased from Sigma-Aldrich. Solid reagents and solvents were used without further purification. Salt cocrystals of [**4-stilbz**·(**4-stilbzH<sup>+</sup>**)(**PF<sub>6</sub><sup>-</sup>**)] were generated by mixing an ethanol (1 mL) solution of **NH<sub>4</sub>PF<sub>6</sub>** (18 mg, 0.11 mmol) with **4-stilbz** (40 mg, 0.22 mmol) in tetrahydrofuran (4 mL). Single crystals as colorless irregular prism-like specimen were obtained after a period of 3 days via evaporation.

### Instruments and methods:

The photodimerization was carried out in an ACE Glass photochemistry cabinet using a 450 W Hanovia medium-pressure mercury lamp with a broad wavelength distribution. Approximately 40-48% of total energy radiated is in the UV of the spectrum, 40-43% in the visible, and the balance in the IR. The single-crystal-to-single-crystal transformation was performed by irradiating single crystals in a UV light gel nail dryer (36 W, wavelength distribution: 380-480 nm with a peak at 365 nm). All single-crystal X-ray diffraction data were collected on a Bruker Nonius APEX II Kappa single-crystal X-ray diffractometer using MoK $\alpha$  radiation ( $\lambda=0.71073$  Å) with APEX II detector. Single crystals were mounted in paratone oil on a Mitegen magnetic mount. Lorentz and polarization corrections with programs from the APEXII package were used for data reduction. Structure solution and refinement were completed using SHELXL<sup>2</sup> and SHELXT<sup>3</sup>, respectively within the Olex2<sup>4</sup> graphical user interface. Non-hydrogen atoms were refined with anisotropically. Pyridium hydrogens were located in a difference map and refined freely. Other hydrogen atoms were positioned geometrically and refined using a riding model. Powder X-ray diffraction data were measured on samples mounted on glass slides using a Bruker D8 Advance X-ray diffractometer with CuK $\alpha_1$  radiation ( $\lambda = 1.54056$  Å) typically in the range of 5–35° two-theta (scan type: locked coupled; scan mode: continuous; step size: 0.02°). The equipment was operated at 40 kV and 30 mA. NMR spectra were collected using a Bruker AVANCE 300 NMR spectrometer operating at 300 MHz. DMSO-*d*<sub>6</sub> was used as NMR solvent. All NMR data were processed with Mnova suite.

## S2. Single-crystal X-ray diffraction data

**Table S1.** Crystallographic parameters for [4-stilbz<sup>+</sup>(4-stilbzH<sup>+</sup>)(PF<sub>6</sub><sup>-</sup>)] (298 K).

|                                             |                                                                 |
|---------------------------------------------|-----------------------------------------------------------------|
| Empirical formula                           | C <sub>26</sub> H <sub>23</sub> F <sub>6</sub> N <sub>2</sub> P |
| Formula weight                              | 508.43                                                          |
| Temperature/K                               | 298.15                                                          |
| Crystal system                              | triclinic                                                       |
| Space group                                 | P-1                                                             |
| a/Å                                         | 10.8408(11)                                                     |
| b/Å                                         | 11.1512(11)                                                     |
| c/Å                                         | 11.3568(11)                                                     |
| α/°                                         | 84.292(5)                                                       |
| β/°                                         | 75.957(5)                                                       |
| γ/°                                         | 69.533(5)                                                       |
| Volume/Å <sup>3</sup>                       | 1247.6(2)                                                       |
| Z                                           | 2                                                               |
| ρ <sub>calc</sub> /cm <sup>3</sup>          | 1.353                                                           |
| μ/mm <sup>-1</sup>                          | 0.172                                                           |
| F(000)                                      | 524.0                                                           |
| Crystal size/mm <sup>3</sup>                | 0.38 × 0.38 × 0.22                                              |
| Radiation                                   | MoKα (λ = 0.71073)                                              |
| 2θ range for data collection/°              | 4.114 to 49                                                     |
| Index ranges                                | -9 ≤ h ≤ 12, -12 ≤ k ≤ 13, -13 ≤ l ≤ 13                         |
| Reflections collected                       | 5701                                                            |
| Independent reflections                     | 3922 [R <sub>int</sub> = 0.0214, R <sub>sigma</sub> = 0.0396]   |
| Data/restraints/parameters                  | 3922/53/436                                                     |
| Goodness-of-fit on F <sup>2</sup>           | 1.073                                                           |
| Final R indexes [I ≥ 2σ (I)]                | R <sub>1</sub> = 0.0550, wR <sub>2</sub> = 0.1465               |
| Final R indexes [all data]                  | R <sub>1</sub> = 0.0889, wR <sub>2</sub> = 0.1637               |
| Largest diff. peak/hole / e Å <sup>-3</sup> | 0.25/-0.23                                                      |
| CCDC deposition number                      | 2025376                                                         |

**Table S2.** Crystallographic parameters for [4-stilbz<sup>+</sup>(4-stilbzH<sup>+</sup>)(PF<sub>6</sub><sup>-</sup>)] (125K).

|                                             |                                                                 |
|---------------------------------------------|-----------------------------------------------------------------|
| Empirical formula                           | C <sub>26</sub> H <sub>23</sub> F <sub>6</sub> N <sub>2</sub> P |
| Formula weight                              | 508.43                                                          |
| Temperature/K                               | 125.15                                                          |
| Crystal system                              | triclinic                                                       |
| Space group                                 | P-1                                                             |
| a/Å                                         | 10.6906(11)                                                     |
| b/Å                                         | 11.0302(11)                                                     |
| c/Å                                         | 11.0850(11)                                                     |
| α/°                                         | 84.721(5)                                                       |
| β/°                                         | 76.416(5)                                                       |
| γ/°                                         | 70.095(2)                                                       |
| Volume/Å <sup>3</sup>                       | 1194.6(2)                                                       |
| Z                                           | 2                                                               |
| ρ <sub>calc</sub> /g/cm <sup>3</sup>        | 1.414                                                           |
| μ/mm <sup>-1</sup>                          | 0.179                                                           |
| F(000)                                      | 524.0                                                           |
| Crystal size/mm <sup>3</sup>                | 0.38 × 0.38 × 0.24                                              |
| Radiation                                   | MoKα (λ = 0.71073)                                              |
| 2θ range for data collection/°              | 3.78 to 52.958                                                  |
| Index ranges                                | -13 ≤ h ≤ 13, -13 ≤ k ≤ 13, -13 ≤ l ≤ 13                        |
| Reflections collected                       | 15560                                                           |
| Independent reflections                     | 4886 [R <sub>int</sub> = 0.0335, R <sub>sigma</sub> = 0.0414]   |
| Data/restraints/parameters                  | 4886/5/327                                                      |
| Goodness-of-fit on F <sup>2</sup>           | 1.021                                                           |
| Final R indexes [I > 2σ (I)]                | R <sub>1</sub> = 0.0488, wR <sub>2</sub> = 0.1090               |
| Final R indexes [all data]                  | R <sub>1</sub> = 0.0704, wR <sub>2</sub> = 0.1231               |
| Largest diff. peak/hole / e Å <sup>-3</sup> | 0.52/-0.30                                                      |
| CCDC deposition number                      | 2052940                                                         |

**Table S3.** Crystallographic parameters for [2(4-stilbz)·(4-pyr-ph-cb2H<sup>+</sup>)(2PF<sub>6</sub><sup>-</sup>)].

|                                             |                                                                 |
|---------------------------------------------|-----------------------------------------------------------------|
| Empirical formula                           | C <sub>26</sub> H <sub>23</sub> F <sub>6</sub> N <sub>2</sub> P |
| Formula weight                              | 508.43                                                          |
| Temperature/K                               | 150.15                                                          |
| Crystal system                              | triclinic                                                       |
| Space group                                 | P-1                                                             |
| a/Å                                         | 9.930(7)                                                        |
| b/Å                                         | 11.296(8)                                                       |
| c/Å                                         | 11.859(9)                                                       |
| α/°                                         | 87.742(10)                                                      |
| β/°                                         | 83.324(9)                                                       |
| γ/°                                         | 65.023(9)                                                       |
| Volume/Å <sup>3</sup>                       | 1197.6(15)                                                      |
| Z                                           | 2                                                               |
| ρ <sub>calc</sub> /cm <sup>3</sup>          | 1.441                                                           |
| μ/mm <sup>-1</sup>                          | 0.188                                                           |
| F(000)                                      | 535.0                                                           |
| Crystal size/mm <sup>3</sup>                | 0.3 × 0.21 × 0.19                                               |
| Radiation                                   | MoKα (λ = 0.71073)                                              |
| 2θ range for data collection/°              | 3.458 to 46.998                                                 |
| Index ranges                                | -11 ≤ h ≤ 11, -12 ≤ k ≤ 12, -13 ≤ l ≤ 13                        |
| Reflections collected                       | 10862                                                           |
| Independent reflections                     | 3517 [R <sub>int</sub> = 0.1342, R <sub>sigma</sub> = 0.1564]   |
| Data/restraints/parameters                  | 3517/183/355                                                    |
| Goodness-of-fit on F <sup>2</sup>           | 0.912                                                           |
| Final R indexes [I > 2σ (I)]                | R <sub>1</sub> = 0.0995, wR <sub>2</sub> = 0.2101               |
| Final R indexes [all data]                  | R <sub>1</sub> = 0.2222, wR <sub>2</sub> = 0.2546               |
| Largest diff. peak/hole / e Å <sup>-3</sup> | 0.57/-0.35                                                      |
| CCDC deposition number                      | 2025377                                                         |

### S3. Hydrogen-bond table.

**Table S3.** Hydrogen-bond metrics for [4-stilbz·(4-stilbzH<sup>+</sup>)(PF<sub>6</sub><sup>-</sup>)] (298K), [4-stilbz·(4-stilbzH<sup>+</sup>)(PF<sub>6</sub><sup>-</sup>)] (125K), and [2(4-stilbz)·(4-pyr-ph-cb2H<sup>+</sup>)(2PF<sub>6</sub><sup>-</sup>)].

| Crystal/parameters                                                                | D-H···A                                               | d(D-H)<br>(Å) | d(H···A)<br>(Å) | d(D···A)<br>(Å) | ∠(D-H···A)<br>(deg) | symmetry code    |
|-----------------------------------------------------------------------------------|-------------------------------------------------------|---------------|-----------------|-----------------|---------------------|------------------|
| <b>[4-stilbz·(4-stilbzH<sup>+</sup>)(PF<sub>6</sub><sup>-</sup>)]<br/>(298 K)</b> | C14 <sup>a</sup> -H14 <sup>a</sup> ···F5 <sup>a</sup> | 0.930(2)      | 2.502(9)        | 3.34(3)         | 151(3)              | -x, -y+1, -z+1   |
|                                                                                   | C18 <sup>a</sup> -H18 <sup>a</sup> ···F1              | 0.930(2)      | 2.601(2)        | 3.52(2)         | 168(2)              | x+1, y, z        |
|                                                                                   | C5 <sup>a</sup> -H5 <sup>a</sup> ···F1                | 0.930(6)      | 2.512(6)        | 3.42 (7)        | 165(4)              | x+1, y, z        |
|                                                                                   | C2 <sup>a</sup> -H2 <sup>a</sup> ···F5 <sup>a</sup>   | 0.930(5)      | 2.635(9)        | 3.53(9)         | 162(5)              | x+1, y, z-1      |
|                                                                                   | C4 <sup>a</sup> -H4 <sup>a</sup> ···F6 <sup>a</sup>   | 0.930(8)      | 2.491(6)        | 3.41(9)         | 168(5)              | -x+1, -y+1, -z+1 |
|                                                                                   | C2B <sup>b</sup> -H2B <sup>b</sup> ···F2              | 0.930(3)      | 2.623(2)        | 3.21(3)         | 122(2)              | x+1, y, z-1      |
|                                                                                   | C14B <sup>b</sup> -H14B <sup>b</sup> ···F1            | 0.930(2)      | 2.526(2)        | 3.28(2)         | 138(3)              | x+1, y, z        |
|                                                                                   | N1 <sup>a</sup> -H1 <sup>a</sup> ···N2 <sup>a</sup>   | 1.010(4)      | 1.716(4)        | 2.72(2)         | 170(3)              |                  |
| <b>[4-stilbz·(4-stilbzH<sup>+</sup>)(PF<sub>6</sub><sup>-</sup>)]<br/>(125 K)</b> | C10-H10···F007                                        | 0.950(2)      | 2.594(2)        | 3.54(3)         | 173(7)              | x-1, y, z        |
|                                                                                   | C11-H11···F002                                        | 0.950(9)      | 2.419 (2)       | 3.33(3)         | 160(3)              | -x+1, -y+1, -z+1 |
|                                                                                   | C13-H13···F005                                        | 0.950(9)      | 2.596(3)        | 3.48(4)         | 155(3)              | -x+1, -y+1, -z+2 |
|                                                                                   | C14-H14···F002                                        | 0.950(9)      | 2.498(2)        | 2.70(2)         | 160(2)              | -x+1, -y+1, -z+1 |
|                                                                                   | N1-H1···N2                                            | 0.971(9)      | 1.739(2)        | 2.70(2)         | 169(1)              |                  |
| <b>[2(4-stilbz)·(4-pyr-ph-cb2H<sup>+</sup>)(2PF<sub>6</sub><sup>-</sup>)]</b>     | N1-H1···N2                                            | 1.000(7)      | 1.761(8)        | 2.68 (9)        | 152(6)              | -x+1, -y+1, -z+1 |

## S4. NMR spectral data

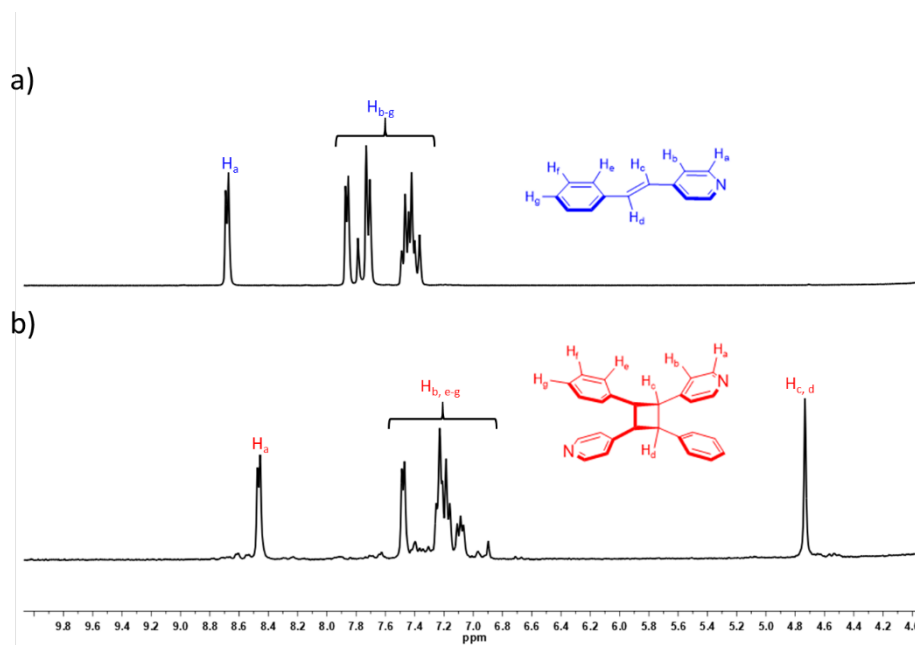

**Fig. S1.** <sup>1</sup>H NMR spectra of [4-stilbz•(4-stilbzH<sup>+</sup>)(PF<sub>6</sub><sup>-</sup>)] before (a) and after UV irradiation for 20 h (b) (300 MHz, DMSO-*d*<sub>6</sub>).

## S5. Powder X-ray diffraction data

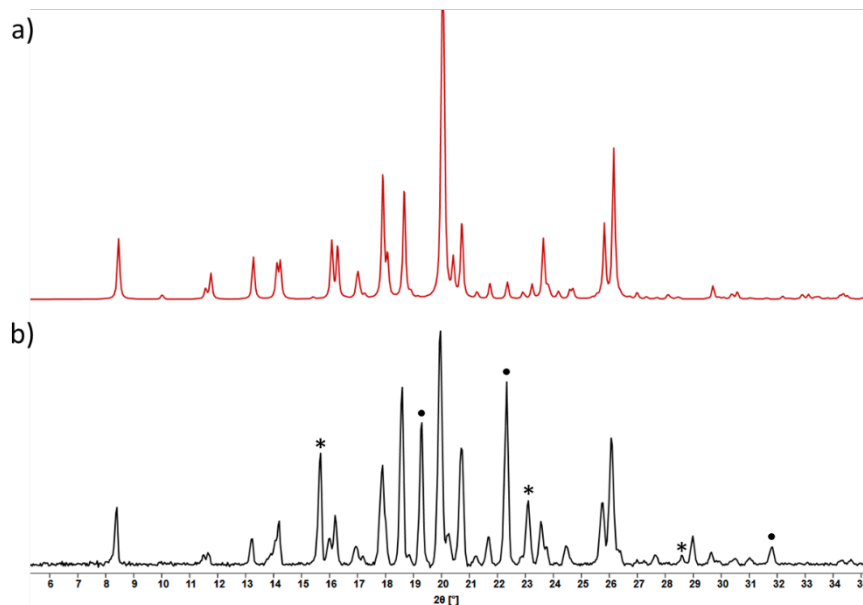

**Fig. S2.** PXRD patterns of  $[4\text{-stilbz}\cdot(4\text{-stilbzH}^+)(\text{PF}_6^-)]$  before UV irradiation: (a) simulated pattern from single crystal X-ray diffraction data; (b) experimental pattern from sample (starting materials: asterisk = 4-stilbazole, dots =  $\text{NH}_4\text{PF}_6$ ).

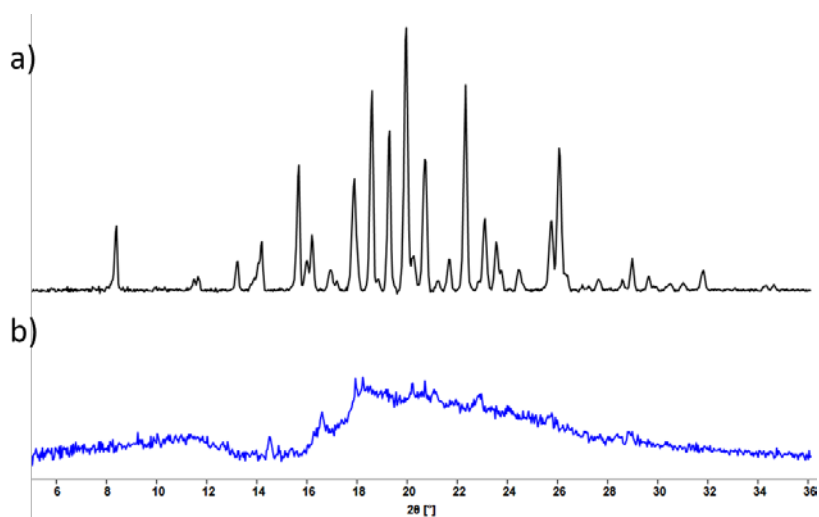

**Fig. S3.** PXRD patterns of  $[4\text{-stilbz}\cdot(4\text{-stilbzH}^+)(\text{PF}_6^-)]$ : (a) before and (b) after 20 h UV irradiation.



## References

1. (a) S. M. N. Eface, R. Michelson, R. P. Rempel, R. Boudreau, A. Dutta and A. Freshler, *J. Med. Chem.*, 1990, **33**, 3133-3138; (b) E. D. Lorance, W. H. Kramer and I. R. Gould, *J. Am. Chem. Soc.*, 2002, **124**, 15225-15238.
2. G. Sheldrick, *Acta Cryst. C*, 2015, **71**, 3-8.
3. G. M. Sheldrick, *Acta Cryst. A*, 2015, **71**, 3-8.
4. O. V. Dolomanov, L. J. Bourhis, R. J. Gildea, J. A. Howard and H. Puschmann, *J. Appl. Crystallogr.*, 2009, **42**, 339-341.
